# Supplementary material for: Background-free in-vivo Imaging of Vitamin C using Time-gateable Responsive Probe
Source: PubMed Central journal article supplement (PMC4570993; doi:10.1038/srep14194), 2015-09-16
Supplement: srep14194-s1.pdf [file srep14194-s1.pdf]

**Supporting information for:**

## **Background-free *in-vivo* Imaging of Vitamin C using Time-gateable Responsive Probe**

Bo Song,<sup>[1]</sup>Zhiqiang Ye,<sup>[1]</sup> Yajie Yang,<sup>[1]</sup> Hua Ma,<sup>[1]</sup> Xianlin Zheng,<sup>[2]</sup> Dayong Jin,<sup>[2]</sup> and Jingli Yuan<sup>\*[1]</sup>

<sup>[1]</sup>State Key Laboratory of Fine Chemicals, School of Chemistry, Dalian University of Technology, Dalian 116024, P. R. China.

<sup>[2]</sup>Advanced Cytometry Labs, ARC Centre of Excellence for Nanoscale BioPhotonics (CNBP), Macquarie University, NSW 2109, Sydney, Australia.

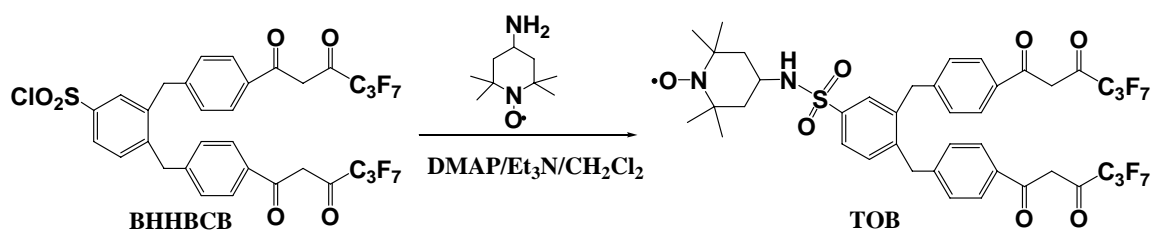

**Scheme S1.** Reaction pathway for the synthesis of TOB.

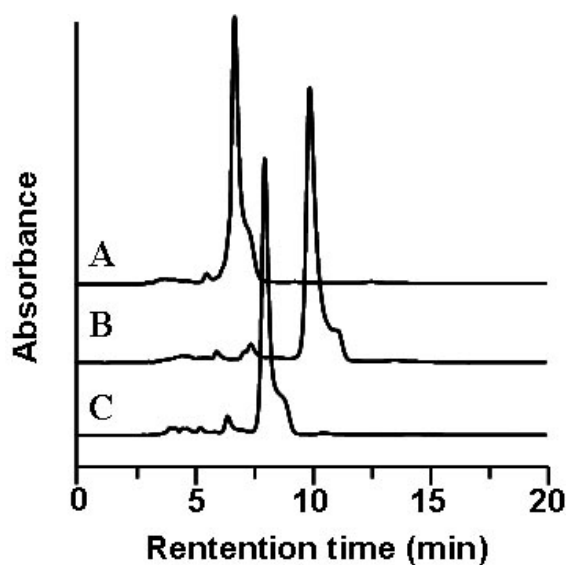

**Figure S1.** HPLC chromatograms of TOHB-Eu<sup>3+</sup> (A), TOB-Eu<sup>3+</sup> (B) and TOB (C).

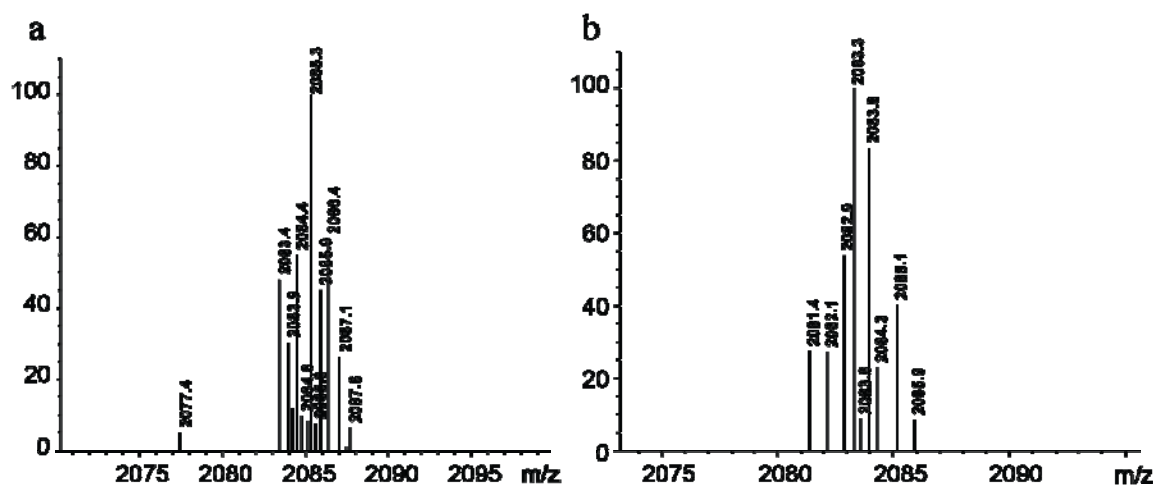

**Figure S2.** ES-API mass spectra of TOHB-Eu<sup>3+</sup> (a) and TOB-Eu<sup>3+</sup> (b).

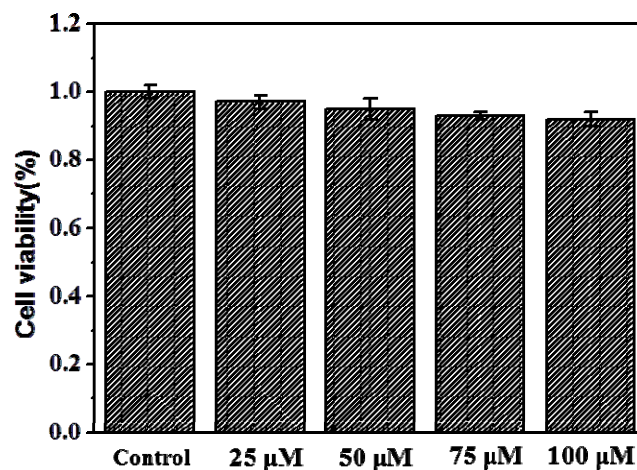

**Figure S3.** Viabilities of the HepG2 cells after incubated with different concentrations of TOB-Eu<sup>3+</sup> for 24 h.

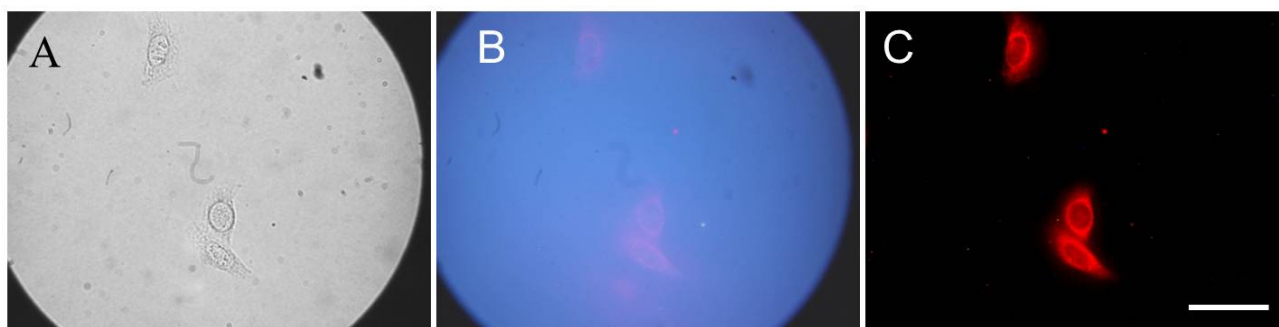

**Figure S4.** Bright-field (A), steady-state (B) and time-gated luminescence images (C) of HepG2 cells loaded with 1.0 mM vitamin C for 40 min and followed by incubation with 20 μM TOB-Eu<sup>3+</sup> for 1 h. Scale bar: 50 μm.

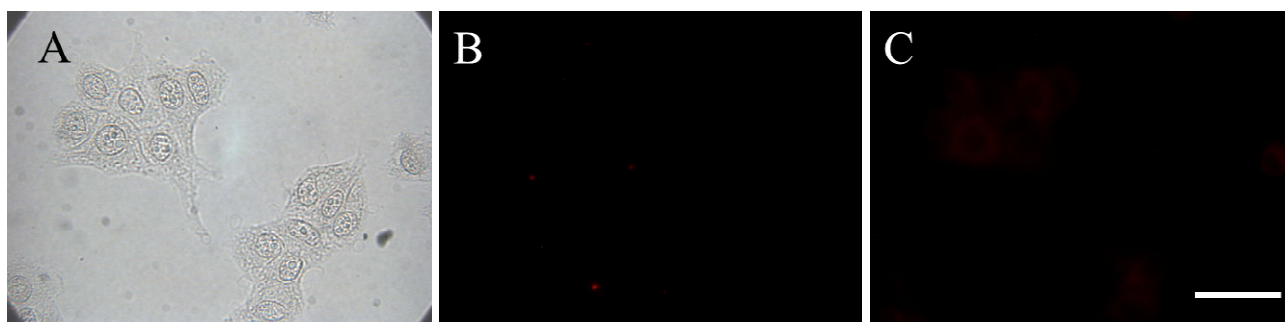

**Figure S5.** Bright-field (A) and time-gated luminescence images of HepG2 cells incubated with 20 μM TOB-Eu<sup>3+</sup> for 1 h (B) or 4 h (C). Scale bar: 50 μm.

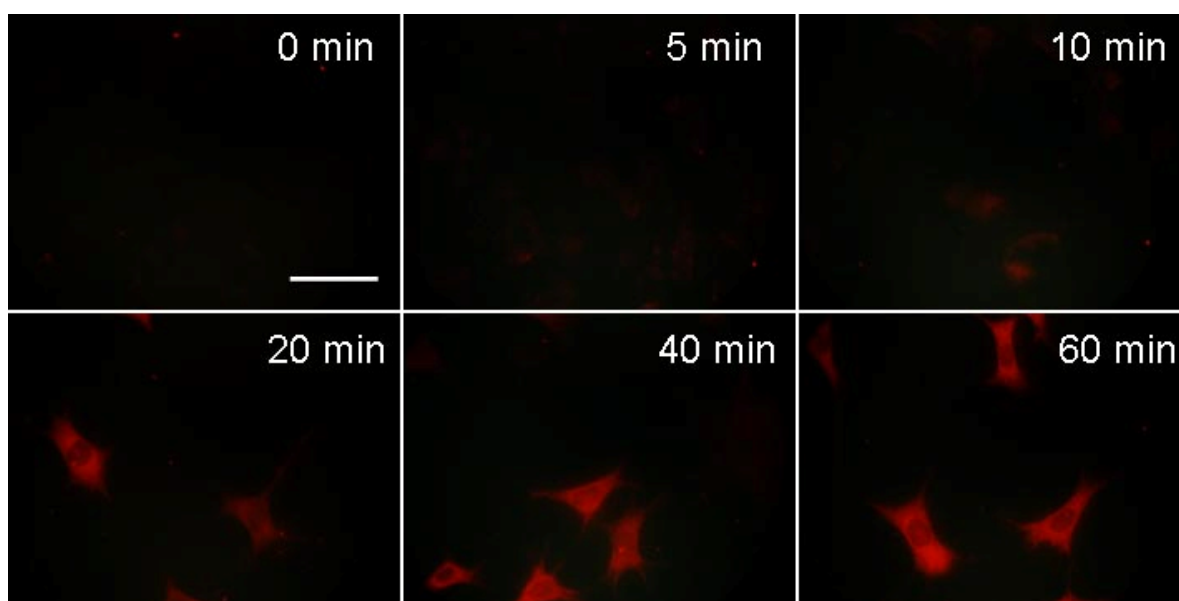

**Figure S6.** Time-gated luminescence microscopy images of HeLa cells loaded with 1.0 mM AA for various incubation times and followed by incubation with 20  $\mu\text{M}$  TOB-Eu<sup>3+</sup> for 1 h. Scale bar: 50  $\mu\text{m}$ .

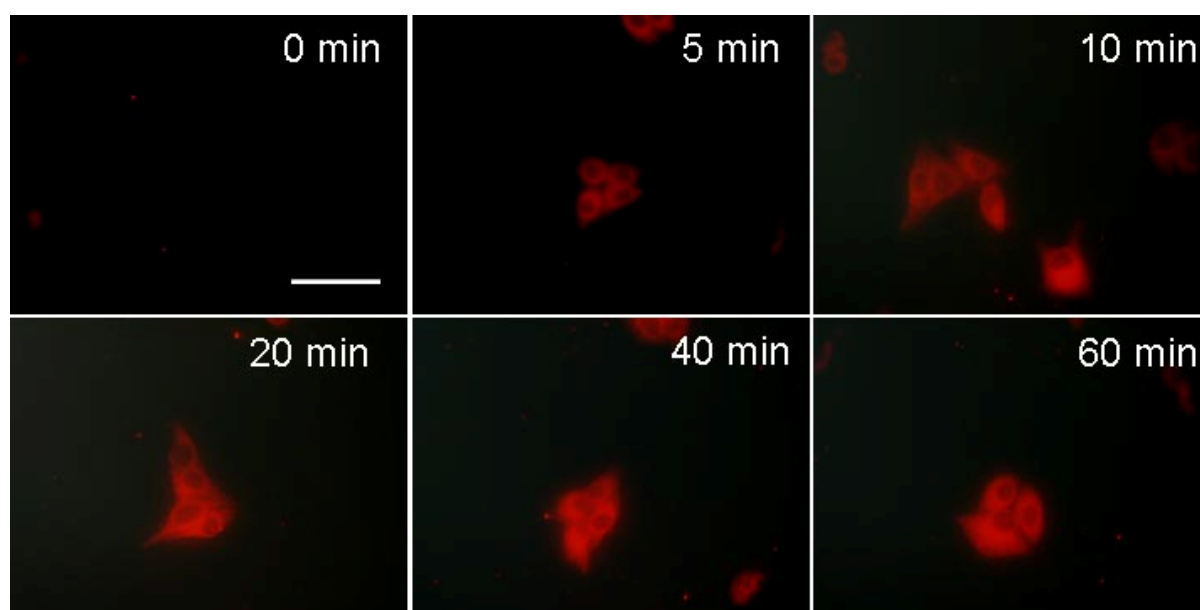

**Figure S7.** Time-gated luminescence microscopy images of HepG2 cells loaded with 1.0 mM DHA for various incubation times and followed by incubation with 20  $\mu\text{M}$  TOB-Eu<sup>3+</sup> for 1 h. Scale bar: 50  $\mu\text{m}$ .
